# Supplementary material
Source: publisher figshare collection journal article supplement (https://gsajournals.figshare.com/articles/dataset/_/11987283)
Supplement: Supplementary file 2 [file 1]

## **File S2 - Supplementary material - Comparison of DEG elicited by a transient androgen increase and a social challenge**

In order to compare differentially expressed genes (DEG) between a transient androgen increase and a social challenge, we have compared the DEG lists for each time sampling in the present study with the DEG lists elicited by a territorial intrusion in another fish species for which this data is available (three-spined stickleback, *Gasterosteus aculeatus*, Bukhari et al. 2017). Raw data from OrthoDB v9.1 (Zdobnov et al. 2017) was used to map orthologous genes between the two species. Briefly, the database was first filtered for the two species of interest, and subsequently the orthogroups at the Actinopterygii level common to both species were identified, totaling 15,033 orthogroups. All paralogs inside each orthogroup for the individual species were kept, representing 17,911 genes in tilapia and 17,320 in stickleback. The R package GeneOverlap 1.22 (Shen and Sinai 2019) was used to assess the significance of the overlap between the orthogroup lists between tilapia and stickleback, using the total number of orthologs common to both species as the genome size. The results are presented in the table below.

**Table S.10** – Comparison of DEG elicited by a transient androgen increase in the tilapia (Til) and a social challenge in the stickleback (S). Detailed information obtained with the GeneOverlap R package, namely contingency tables, overlapping p-values, odds ratio (OR), Jaccard Index (J), and overlapping genes. DEG obtained for the KT- and T-treated groups in the tilapia were compared with the DEG reported for the telencephalon (Tel) and Diencephalon (Diec) in the stickleback, for the same time points (30 and 60 min).

|         | Stickleback                                                                                                                                                                                                                                        |                                                                                                                                                                   |                                                                                                                                                           |                                                                                                                                |
|---------|----------------------------------------------------------------------------------------------------------------------------------------------------------------------------------------------------------------------------------------------------|-------------------------------------------------------------------------------------------------------------------------------------------------------------------|-----------------------------------------------------------------------------------------------------------------------------------------------------------|--------------------------------------------------------------------------------------------------------------------------------|
|         | Tel_30                                                                                                                                                                                                                                             | Diec_30                                                                                                                                                           | Tel_60                                                                                                                                                    | Diec_60                                                                                                                        |
| Tilapia | <b>KT_30</b><br>Contingency Table:<br>notS inS<br>notTil 14572 209<br>inTil 249 3<br><br>p-value=0.69<br>OR=0.8<br>J=0.0<br><br>Overlap genes:<br>EOG090C0054 - myosin<br>XVAb; EOG090C0100 -<br>desmoglein 2 like;<br>EOG090C09K2 - keratin<br>18 | Contingency Table:<br>notS inS<br>notTil 14661 120<br>inTil 252 0<br><br>p-value=1<br>OR=0.0<br>J=0.0<br><br>Overlap genes: none                                  |                                                                                                                                                           |                                                                                                                                |
|         | <b>T_30</b><br>Contingency Table:<br>notS inS<br>notTil 14761 210<br>inTil 60 2<br><br>p-value=0.22<br>OR=2.3<br>J=0.0<br><br>Overlap genes:<br>EOG090C00XK –<br>Uncharacterized;<br>EOG090C0054 - myosin<br>XVAb                                  | Contingency Table:<br>notS inS<br>notTil 14852 119<br>inTil 61 1<br><br>p-value=0.39<br>OR=2.0<br>J=0.0<br><br>Overlap genes:<br>EOG090C00XK -<br>Uncharacterized |                                                                                                                                                           |                                                                                                                                |
|         | <b>KT_60</b>                                                                                                                                                                                                                                       |                                                                                                                                                                   | Contingency Table:<br>notS inS<br>notTil 14455 577<br>inTil 1 0<br><br>p-value=1<br>OR=0.0<br>J=0.0<br><br>Overlap genes: none                            | Contingency Table:<br>notS inS<br>notTil 14505 527<br>inTil 1 0<br><br>p-value=1<br>OR=0.0<br>J=0.0<br><br>Overlap genes: none |
|         | <b>T_60</b>                                                                                                                                                                                                                                        |                                                                                                                                                                   | Contingency Table:<br>notS inS<br>notTil 14452 576<br>inTil 4 1<br><br>p-value=0.18<br>OR=6.3<br>J=0.0<br><br>Overlap genes:<br>EOG090C00AM -plexin<br>A1 | Contingency Table:<br>notS inS<br>notTil 14501 527<br>inTil 5 0<br><br>p-value=1<br>OR=0.0<br>J=0.0<br><br>Overlap genes: none |

## References

Bukhari, S. A., M. C. Saul, C. H. Seward, H. Zhang, M. Bensky *et al.*, 2017 Temporal dynamics of neurogenomic plasticity in response to social interactions in male

threespined sticklebacks. *Plos Genet.* 13: 1–21.

Shen L., and M. Sinai, 2019 *GeneOverlap: Test and visualize gene overlaps*. R package version 1.22.0, <http://shenlab-sinai.github.io/shenlab-sinai/>.

Zdobnov, E. M., F. Tegenfeldt, D. Kuznetsov, R. M. Waterhouse, F. A. Simão, P. Ioannidis, M. Seppey, A. Loetscher, and E. V. Kriventseva, 2017 OrthoDB v9.1: cataloging evolutionary and functional annotations for animal, fungal, plant, archaeal, bacterial and viral orthologs. *Nucleic Acids Res.* 45: D744–D749.
